# Supplementary material for: Robust biopolymer based ionic–covalent entanglement hydrogels with reversible mechanical behaviour
Source: Royal Society of Chemistry journal article supplement (doi:10.1039/c4tb00258j), 2014-01-01
Supplement: c4tb00258j1.pdf [file c4tb00258j1.pdf]

**Electronic Supplementary Information for**

**Robust biopolymer based ionic-covalent entanglement hydrogels with reversible mechanical behaviour.**

*Damian M. Kirchmayer and Marc in het Panhuis\**

Soft Materials Group, School of Chemistry and Intelligent Polymer Research Institute, ARC Centre of Excellence for Electromaterials Science, AIIIM Facility, University of Wollongong, Wollongong, NSW 2522, Australia.

**S1. Mechanical Characterisation**

**Table S1.** The compressive mechanical properties of gellan gum-gelatin hydrogels possessing various molar network ratios ( $\pm$  standard deviation). Hydrogels were prepared with the same concentrations of calcium and genipin cross-linkers but varying ratios of gellan gum and gelatin.

| <b>Gelatin / (gelatin + gellan gum)</b><br><b>(%)</b> | <b><math>\sigma_c</math></b><br><b>(MPa)</b> | <b><math>\epsilon_c</math></b><br><b>(%)</b> | <b><math>E_c</math></b><br><b>(kPa)</b> | <b>U</b><br><b>(kJ.m<sup>-3</sup>)</b> |
|-------------------------------------------------------|----------------------------------------------|----------------------------------------------|-----------------------------------------|----------------------------------------|
| 33                                                    | 0.27 $\pm$ 0.06                              | 76 $\pm$ 2                                   | 56 $\pm$ 6                              | 40 $\pm$ 5                             |
| 50                                                    | 0.6 $\pm$ 0.2                                | 81 $\pm$ 3                                   | 56 $\pm$ 5                              | 70 $\pm$ 20                            |
| 56                                                    | 0.8 $\pm$ 0.2                                | 85 $\pm$ 2                                   | 60 $\pm$ 20                             | 100 $\pm$ 10                           |
| 60                                                    | 0.9 $\pm$ 0.2                                | 85 $\pm$ 2                                   | 79 $\pm$ 9                              | 110 $\pm$ 20                           |
| 64                                                    | 1.1 $\pm$ 0.2                                | 85 $\pm$ 1                                   | 120 $\pm$ 20                            | 150 $\pm$ 20                           |
| 69                                                    | 0.8 $\pm$ 0.3                                | 81 $\pm$ 4                                   | 180 $\pm$ 20                            | 130 $\pm$ 40                           |
| 71                                                    | 0.5 $\pm$ 0.1                                | 74 $\pm$ 4                                   | 180 $\pm$ 20                            | 90 $\pm$ 20                            |

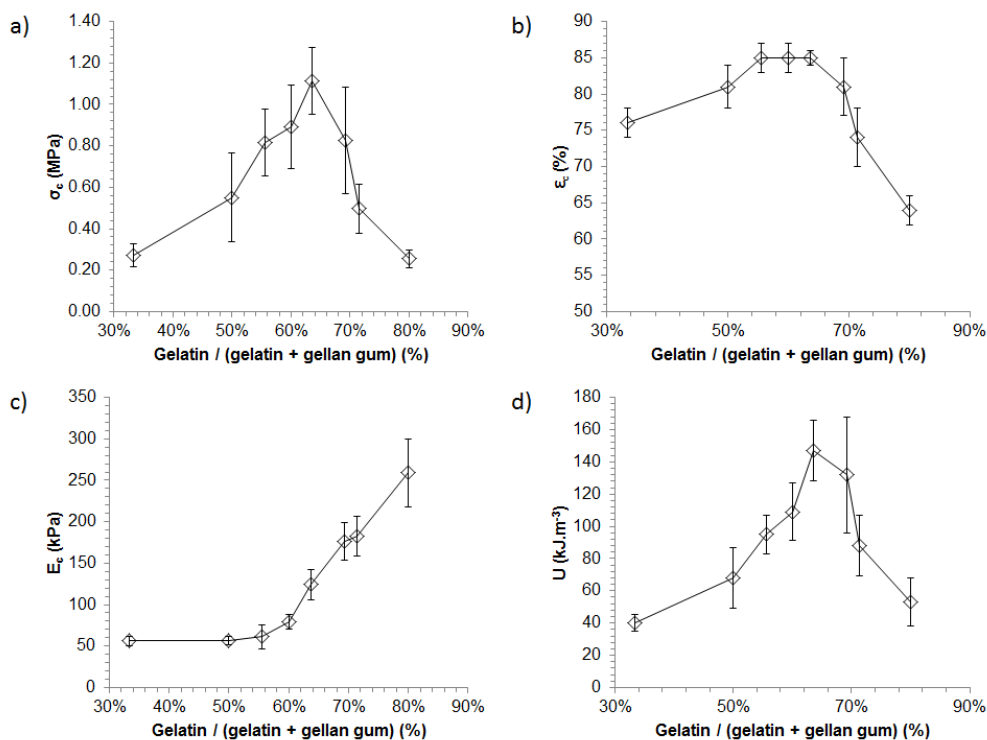

**Figure S1.** The polymer network ratio affects the a) maximum compressive stress, b) secant modulus, c) maximum compressive strain, and d) strain energy to failure ( $\pm$  SD).

**Table S2.** The compressive mechanical properties of gellan gum-gelatin hydrogels possessing various calcium concentrations ( $\pm$  SD). Hydrogels were prepared with the same concentrations of gellan gum and gelatin polymers and genipin cross-linker but concentrations of calcium.

| [Ca <sup>2+</sup> ] | $\sigma_c$  | $\epsilon_c$ | $E_c$    | U                                 |
|---------------------|-------------|--------------|----------|-----------------------------------|
| % (w/w)             | (MPa)       | (%)          | (kPa)    | ( $\text{kJ}\cdot\text{m}^{-3}$ ) |
| 0.0                 | 0.30 ± 0.08 | 72 ± 4       | 120 ± 20 | 50 ± 10                           |

|     |                 |            |              |              |
|-----|-----------------|------------|--------------|--------------|
| 0.4 | $0.5 \pm 0.1$   | $77 \pm 3$ | $160 \pm 10$ | $80 \pm 10$  |
| 0.8 | $0.6 \pm 0.2$   | $82 \pm 2$ | $130 \pm 10$ | $100 \pm 20$ |
| 2   | $1.1 \pm 0.2$   | $85 \pm 1$ | $120 \pm 20$ | $150 \pm 20$ |
| 4   | $0.9 \pm 0.2$   | $82 \pm 2$ | $140 \pm 10$ | $130 \pm 20$ |
| 8   | $0.5 \pm 0.1$   | $69 \pm 4$ | $290 \pm 30$ | $100 \pm 20$ |
| 20  | $0.29 \pm 0.01$ | $64 \pm 1$ | $350 \pm 20$ | $72 \pm 4$   |

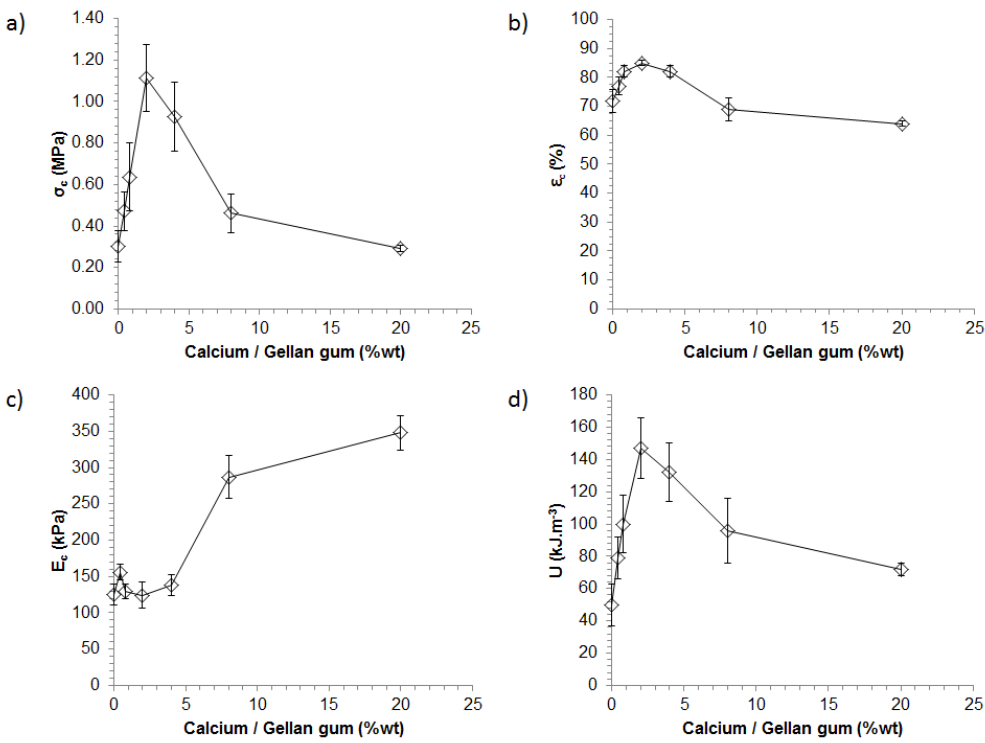

**Figure S2.** The concentration of calcium cross-linker affects the a) maximum compressive stress, b) secant modulus, c) maximum compressive strain, and d) strain energy to failure ( $\pm$  SD).

**Table S3.** The compressive mechanical properties of gellan gum-gelatin hydrogels with genipin concentrations ( $\pm$  SD). Hydrogels were prepared with the same concentrations of gellan gum and gelatin polymers and calcium cross-linker but concentrations of genipin.

| <b>[Genipin]</b> | <b><math>\sigma_c</math></b> | <b><math>\epsilon_c</math></b> | <b><math>E_c</math></b> | <b>U</b>                   |
|------------------|------------------------------|--------------------------------|-------------------------|----------------------------|
| <b>%(w/w)</b>    | <b>(MPa)</b>                 | <b>(%)</b>                     | <b>(kPa)</b>            | <b>(kJ.m<sup>-3</sup>)</b> |
| 0                | 0.19 $\pm$ 0.04              | 57 $\pm$ 3                     | 190 $\pm$ 10            | 38 $\pm$ 7                 |
| 4                | 0.5 $\pm$ 0.1                | 74 $\pm$ 4                     | 150 $\pm$ 10            | 80 $\pm$ 20                |
| 8                | 0.64 $\pm$ 0.09              | 78 $\pm$ 2                     | 150 $\pm$ 20            | 100 $\pm$ 10               |
| 12               | 0.7 $\pm$ 0.2                | 80 $\pm$ 3                     | 120 $\pm$ 20            | 100 $\pm$ 30               |
| 16               | 1.0 $\pm$ 0.2                | 84 $\pm$ 2                     | 100 $\pm$ 20            | 130 $\pm$ 20               |
| 20               | 1.1 $\pm$ 0.2                | 85 $\pm$ 1                     | 120 $\pm$ 20            | 150 $\pm$ 20               |
| 24               | 1.1 $\pm$ 0.2                | 85 $\pm$ 1                     | 110 $\pm$ 20            | 140 $\pm$ 20               |
| 28               | 1.0 $\pm$ 0.1                | 86 $\pm$ 2                     | 100 $\pm$ 10            | 140 $\pm$ 20               |

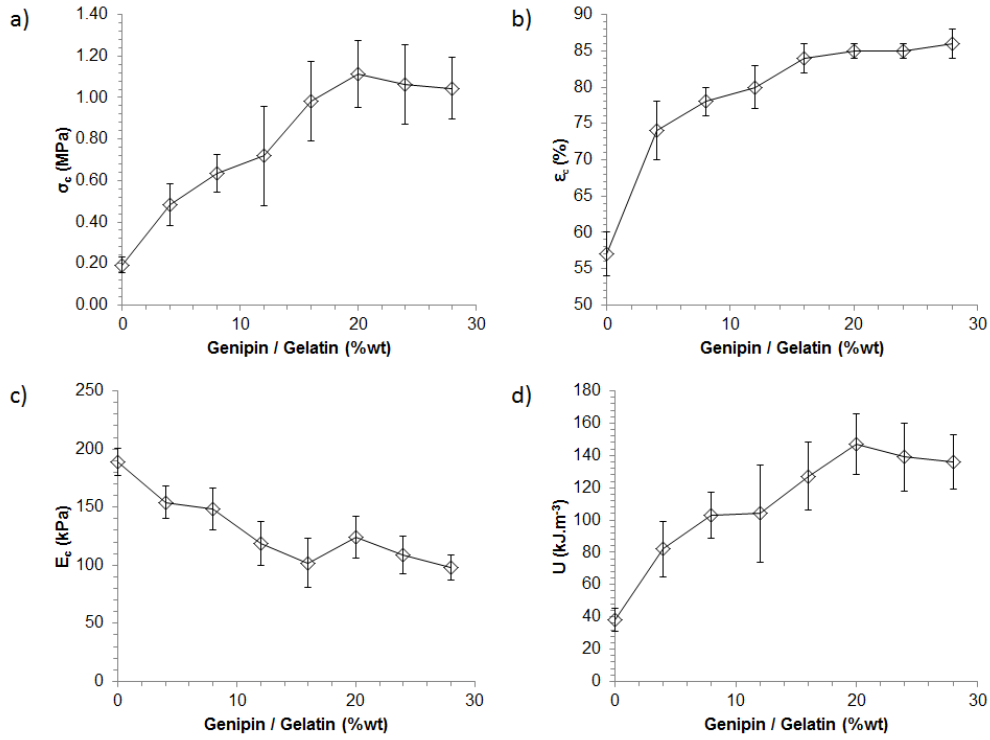

**Figure S3.** The concentration of genipin cross-linker affects the a) maximum compressive stress, b) secant modulus, c) maximum compressive strain, and d) strain energy to failure ( $\pm$  SD).

## S2. Immersion studies

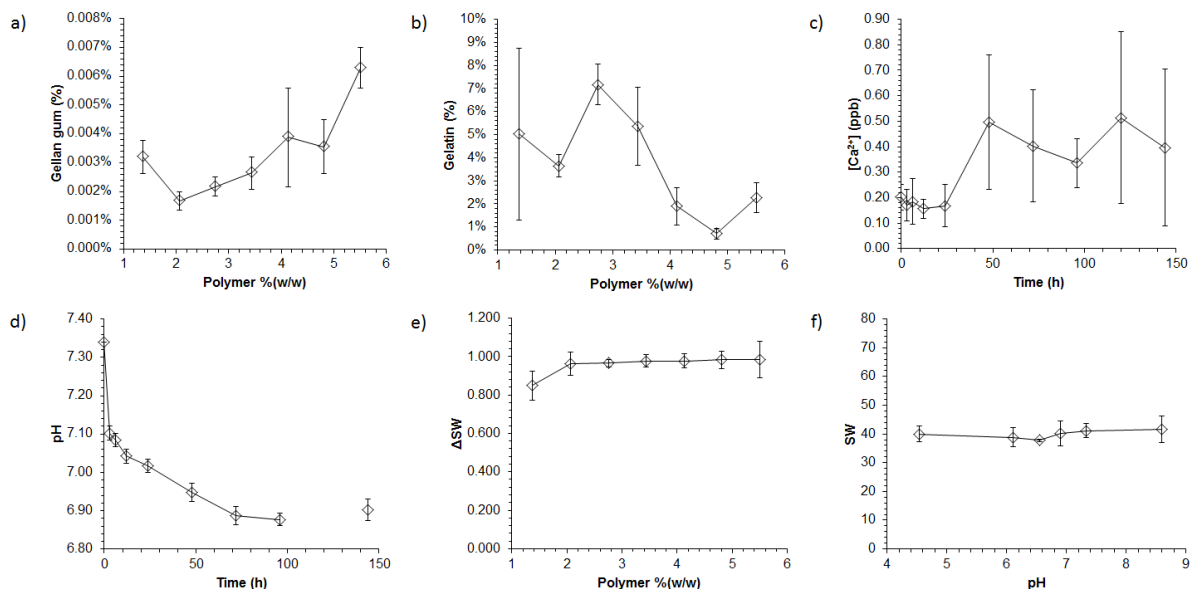

**Figure S4.** a) The percentage of gellan gum leached from hydrogels of different polymer concentrations after 144 hours immersion in SBF, b) the percentage of gelatin leached from hydrogels of different polymer concentrations after 144 hours immersion in SBF, c) the concentration of calcium in SBF containing a 2.75% (w/w) polymer hydrogel at different immersion intervals, d) The pH of SBF containing a 2.75% (w/w) polymer hydrogel at different immersion intervals, e) the change in swelling ratio of hydrogels of different polymer concentrations after 144 hours immersion in SBF, f) the swelling ratio of 2.75% (w/w) polymer hydrogels after being immersed in 0.1 M PBS solutions for 24 h of different pHs ( $\pm$ SD).

**Table S4.** Gellan gum and gelatin concentration and pH of simulated body fluid and the corresponding swelling ratio of hydrogels with different polymer concentrations with respect to immersion time.

| <b>Polymer<br/>%(w/v)</b> | <b>Immersion<br/>time (h)</b> | <b>Gellan<br/>gum<br/>leached<br/>(%)</b> | <b>Gelatin<br/>leached<br/>(%)</b> | <b>pH</b>   | <b>Swelling<br/>ratio</b> |
|---------------------------|-------------------------------|-------------------------------------------|------------------------------------|-------------|---------------------------|
| 1.375                     | 0                             | 0                                         | 0                                  | 7.46 ± 0.01 | 75 ± 3                    |
|                           | 3                             |                                           | 0.0 ± 0.1                          | 7.54 ± 0.01 | 70 ± 2                    |
|                           | 6                             |                                           | 1 ± 1                              | 7.55 ± 0.02 | 68 ± 4                    |
|                           | 12                            |                                           | 0.8 ± 0.9                          | 7.49 ± 0.03 | 66 ± 3                    |
|                           | 24                            | 0.002 ± 0.001                             | 2 ± 2                              | 7.55 ± 0.02 | 66 ± 3                    |
|                           | 48                            |                                           | 2 ± 2                              | 7.54 ± 0.02 | 65 ± 4                    |
|                           | 72                            | 0.0024 ± 0.0007                           | 2 ± 1                              | 7.50 ± 0.03 | 65 ± 3                    |
|                           | 96                            |                                           | 2 ± 1                              | 7.48 ± 0.02 | 65 ± 3                    |
|                           | 120                           |                                           | 3 ± 3                              | 7.44 ± 0.03 | 64 ± 2                    |
|                           | 144                           | 0.0032 ± 0.0006                           | 5 ± 4                              | 7.46 ± 0.03 | 64 ± 4                    |

| <b>Polymer<br/>%(w/v)</b> | <b>Immersion<br/>time (h)</b> | <b>Gellan<br/>gum<br/>leached<br/>(%)</b> | <b>Gelatin<br/>leached<br/>(%)</b> | <b>pH</b>   | <b>Swelling<br/>ratio</b> |
|---------------------------|-------------------------------|-------------------------------------------|------------------------------------|-------------|---------------------------|
| 2.062                     | 0                             | 0                                         | 0.0                                | 7.39 ± 0.01 | 53 ± 2                    |
|                           | 3                             |                                           | 0.5 ± 0.1                          | 7.12 ± 0.02 | 53 ± 2                    |
|                           | 6                             |                                           | 1.0 ± 0.3                          | 7.10 ± 0.02 | 53 ± 2                    |
|                           | 12                            |                                           | 1.6 ± 0.3                          | 7.08 ± 0.02 | 53 ± 2                    |
|                           | 24                            | 0.0026 ± 0.0009                           | 2.5 ± 0.3                          | 7.12 ± 0.02 | 52 ± 2                    |
|                           | 48                            |                                           | 3.3 ± 0.4                          | 7.04 ± 0.02 | 51 ± 2                    |
|                           | 72                            | 0.002 ± 0.001                             | 3.6 ± 0.7                          | 7.04 ± 0.04 | 52 ± 2                    |
|                           | 96                            |                                           | 3.3 ± 0.5                          | 6.99 ± 0.01 | 51 ± 2                    |

|     |  |                     |  |  |               |                 |            |
|-----|--|---------------------|--|--|---------------|-----------------|------------|
| 120 |  |                     |  |  | $3.3 \pm 0.4$ | $6.96 \pm 0.01$ | $52 \pm 2$ |
| 144 |  | $0.0017 \pm 0.0003$ |  |  | $3.6 \pm 0.5$ | $7.00 \pm 0.03$ | $51 \pm 2$ |

| Polymer<br>%(w/v) | Immersion<br>time (h) | Gellan<br>gum<br>(%) | leached | Gelatin<br>leached<br>(%) | pH              | Swelling<br>ratio |
|-------------------|-----------------------|----------------------|---------|---------------------------|-----------------|-------------------|
| 2.750             | 0                     | 0.0000               |         | 0.0                       | $7.34 \pm 0.01$ | $40.9 \pm 0.6$    |
|                   | 3                     |                      |         | $0.5 \pm 0.2$             | $7.10 \pm 0.02$ | $40.5 \pm 0.6$    |
|                   | 6                     |                      |         | $1.6 \pm 0.7$             | $7.09 \pm 0.02$ | $40.7 \pm 0.6$    |
|                   | 12                    |                      |         | $3.4 \pm 0.9$             | $7.04 \pm 0.02$ | $40.1 \pm 0.6$    |
|                   | 24                    | $0.0018 \pm 0.0009$  |         | $5.9 \pm 0.8$             | $7.02 \pm 0.02$ | $39.9 \pm 0.6$    |
|                   | 48                    |                      |         | $9 \pm 2$                 | $6.95 \pm 0.2$  | $40.0 \pm 0.6$    |
|                   | 72                    | $0.002 \pm 0.001$    |         | $8 \pm 2$                 | $6.89 \pm 0.2$  | $39.7 \pm 0.5$    |
|                   | 96                    |                      |         | $8 \pm 2$                 | $6.88 \pm 0.2$  | $39.7 \pm 0.6$    |
|                   | 120                   |                      |         | $6 \pm 1$                 | $7.00 \pm 0.3$  | $39.9 \pm 0.7$    |
|                   | 144                   | $0.0022 \pm 0.0003$  |         | $7.2 \pm 0.9$             | $6.90 \pm 0.3$  | $39.5 \pm 0.5$    |

| Polymer<br>%(w/v) | Immersion<br>time (h) | Gellan<br>gum<br>(%) | leached | Gelatin<br>leached<br>(%) | pH              | Swelling<br>ratio |
|-------------------|-----------------------|----------------------|---------|---------------------------|-----------------|-------------------|
| 3.438             | 0                     | 0.0000               |         | 0.0                       | $7.31 \pm 0.01$ | $31.4 \pm 0.7$    |
|                   | 3                     |                      |         | $0.1 \pm 0.1$             | $7.06 \pm 0.02$ | $31.2 \pm 0.8$    |
|                   | 6                     |                      |         | $1.0 \pm 0.9$             | $7.05 \pm 0.02$ | $31.1 \pm 0.7$    |
|                   | 12                    |                      |         | $2.3 \pm 0.9$             | $6.99 \pm 0.02$ | $31.0 \pm 0.7$    |
|                   | 24                    | $0.0029 \pm 0.0007$  |         | $5 \pm 2$                 | $6.91 \pm 0.02$ | $30.9 \pm 0.7$    |
|                   | 48                    |                      |         | $7 \pm 2$                 | $6.86 \pm 0.02$ | $30.9 \pm 0.7$    |



|     |                     |               |                 |                |
|-----|---------------------|---------------|-----------------|----------------|
| 72  | $0.0023 \pm 0.0008$ | $6 \pm 2$     | $6.83 \pm 0.02$ | $30.7 \pm 0.7$ |
| 96  |                     | $5 \pm 1$     | $6.77 \pm 0.02$ | $30.9 \pm 0.7$ |
| 120 |                     | $4.6 \pm 0.8$ | $6.79 \pm 0.01$ | $30.8 \pm 0.7$ |
| 144 | $0.0026 \pm 0.0006$ | $5 \pm 2$     | $6.78 \pm 0.02$ | $30.7 \pm 0.7$ |

| Polymer<br>%(w/v) | Immersion<br>time (h) | Gellan<br>gum<br>(%) | leached | Gelatin<br>leached<br>(%) | pH              | Swelling<br>ratio |
|-------------------|-----------------------|----------------------|---------|---------------------------|-----------------|-------------------|
| 4.125             | 0                     | 0.0000               |         | 0.0                       | $7.50 \pm 0.01$ | $26.1 \pm 0.7$    |
|                   | 3                     |                      |         | $0.1 \pm 0.2$             | $7.31 \pm 0.02$ | $25.9 \pm 0.6$    |
|                   | 6                     |                      |         | $0.6 \pm 0.6$             | $7.26 \pm 0.02$ | $25.8 \pm 0.6$    |
|                   | 12                    |                      |         | $1.0 \pm 0.7$             | $7.19 \pm 0.02$ | $25.7 \pm 0.6$    |
|                   | 24                    | $0.0032 \pm 0.0008$  |         | $1.4 \pm 0.8$             | $7.15 \pm 0.03$ | $25.6 \pm 0.6$    |
|                   | 48                    |                      |         | $1.5 \pm 0.6$             | $7.12 \pm 0.03$ | $25.5 \pm 0.6$    |
|                   | 72                    | $0.0032 \pm 0.0009$  |         | $1.5 \pm 0.7$             | $7.07 \pm 0.03$ | $25.6 \pm 0.6$    |
|                   | 96                    |                      |         | $1.5 \pm 0.4$             | $7.07 \pm 0.02$ | $25.5 \pm 0.6$    |
|                   | 120                   |                      |         | $1.5 \pm 0.7$             | $7.07 \pm 0.02$ | $25.5 \pm 0.6$    |
|                   | 144                   | $0.004 \pm 0.002$    |         | $1.9 \pm 0.8$             | $7.12 \pm 0.03$ | $25.5 \pm 0.6$    |

| Polymer<br>%(w/v) | Immersion<br>time (h) | Gellan<br>gum<br>(%) | leached | Gelatin<br>leached<br>(%) | pH              | Swelling<br>ratio |
|-------------------|-----------------------|----------------------|---------|---------------------------|-----------------|-------------------|
| 4.812             | 0                     | 0.0000               |         | 0.0                       | $7.44 \pm 0.01$ | $21.4 \pm 0.7$    |
|                   | 3                     |                      |         | 0.0                       | $7.35 \pm 0.02$ | $21.2 \pm 0.6$    |
|                   | 6                     |                      |         | $0.1 \pm 0.1$             | $7.30 \pm 0.02$ | $21.2 \pm 0.7$    |
|                   | 12                    |                      |         | $0.4 \pm 0.2$             | $7.26 \pm 0.03$ | $21.1 \pm 0.7$    |

|     |                     |               |                 |                |
|-----|---------------------|---------------|-----------------|----------------|
| 24  | $0.0033 \pm 0.0007$ | $0.9 \pm 0.4$ | $7.21 \pm 0.02$ | $21.1 \pm 0.7$ |
| 48  |                     | $0.9 \pm 0.4$ | $7.16 \pm 0.01$ | $21.0 \pm 0.7$ |
| 72  | $0.0025 \pm 0.0004$ | $0.9 \pm 0.5$ | $7.15 \pm 0.02$ | $21.0 \pm 0.7$ |
| 96  |                     | $0.7 \pm 0.3$ | $7.16 \pm 0.02$ | $21.0 \pm 0.6$ |
| 120 |                     | $0.6 \pm 0.2$ | $7.20 \pm 0.04$ | $21.0 \pm 0.6$ |
| 144 | $0.0036 \pm 0.0009$ | $0.7 \pm 0.2$ | $7.31 \pm 0.04$ | $21.0 \pm 0.7$ |

| <b>Polymer<br/>%(w/v)</b> | <b>Immersion<br/>time (h)</b> | <b>Gellan<br/>gum<br/>leached<br/>(%)</b> | <b>Gelatin<br/>leached<br/>(%)</b> | <b>pH</b>       | <b>Swelling<br/>ratio</b> |
|---------------------------|-------------------------------|-------------------------------------------|------------------------------------|-----------------|---------------------------|
| 5.500                     | 0                             | 0.0000                                    | 0.0                                | $7.34 \pm 0.01$ | $19 \pm 1$                |
|                           | 3                             |                                           | $0.4 \pm 0.1$                      | $7.32 \pm 0.01$ | $19 \pm 1$                |
|                           | 6                             |                                           | $1.4 \pm 0.4$                      | $7.31 \pm 0.02$ | $19 \pm 1$                |
|                           | 12                            |                                           | $2.4 \pm 0.6$                      | $7.29 \pm 0.03$ | $19 \pm 1$                |
|                           | 24                            | $0.0039 \pm 0.0008$                       | $3 \pm 1$                          | $7.13 \pm 0.03$ | $19 \pm 1$                |
|                           | 48                            |                                           | $3 \pm 1$                          | $7.14 \pm 0.03$ | $19 \pm 1$                |
|                           | 72                            | $0.004 \pm 0.001$                         | $3 \pm 1$                          | $7.12 \pm 0.04$ | $19 \pm 1$                |
|                           | 96                            |                                           | $2.3 \pm 0.6$                      | $7.17 \pm 0.04$ | $19 \pm 1$                |
|                           | 120                           |                                           | $2.0 \pm 0.6$                      | $7.15 \pm 0.04$ | $19 \pm 1$                |
|                           | 144                           | $0.0063 \pm 0.0007$                       | $2.3 \pm 0.7$                      | $7.17 \pm 0.03$ | $19 \pm 1$                |

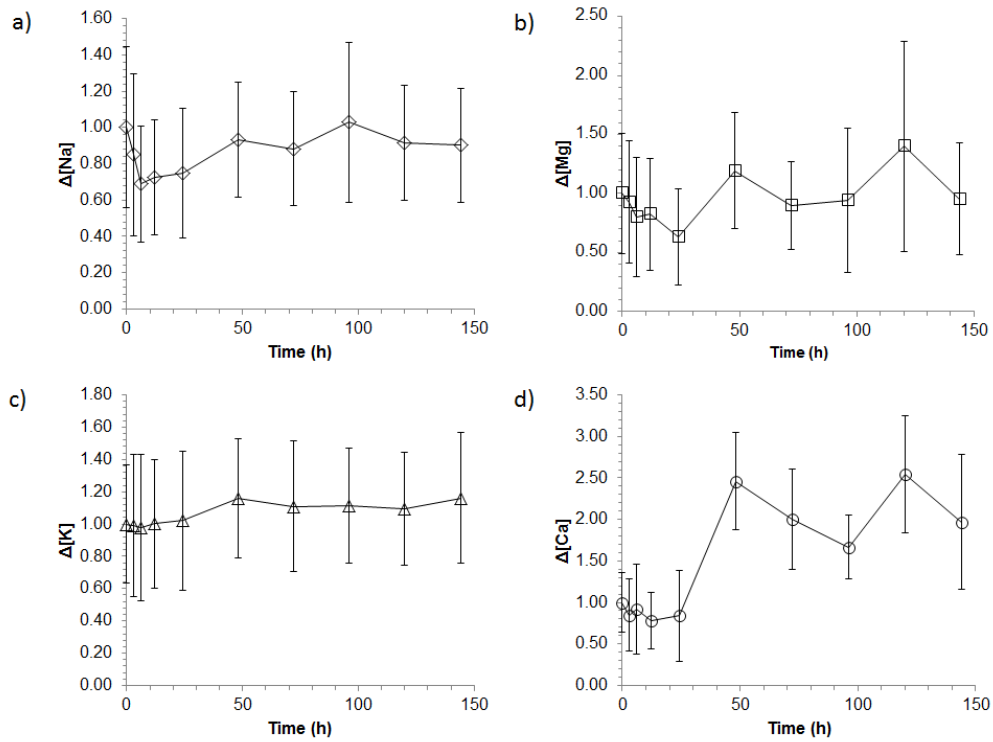

**Figure S5.** Change in concentration of sodium, magnesium, potassium and calcium ions in SBF with a 2.75% (w/w) polymer hydrogel immersed in them for different periods of time.
